# Supplementary material for: Persistent Transmission of HCV among Men Who Have Sex with Men despite Widespread Screening and Treatment with Direct-Acting Antivirals
Source: MDPI journal article supplement (doi:10.3390/v14091953), 2022-09-02
Supplement: s1 [file s1]

# Supplemental information

Table S1

|                                                                                                                                                         | All patients<br>(n=80)        | HCV genotype 1a<br>(n=51)     | HCV genotype 4<br>(n=29)      |
|---------------------------------------------------------------------------------------------------------------------------------------------------------|-------------------------------|-------------------------------|-------------------------------|
| Age (years)                                                                                                                                             | 47 (10)                       | 47 (10)                       | 49 (8)                        |
| Male sex                                                                                                                                                | 80 (100%)                     | 51 (100%)                     | 29 (100%)                     |
| Race                                                                                                                                                    |                               |                               |                               |
| White                                                                                                                                                   | 72 (90%)                      | 46 (90%)                      | 26 (90%)                      |
| HCV transmission route                                                                                                                                  |                               |                               |                               |
| MSM                                                                                                                                                     | 80 (100%)                     | 51 (100%)                     | 29 (100%)                     |
| Current episode is a reinfection                                                                                                                        | 19 (24%)                      | 12 (24%)                      | 7 (24%)                       |
| Number of HCV episodes                                                                                                                                  |                               |                               |                               |
| 1                                                                                                                                                       | 61 (76%)                      | 39 (76%)                      | 22 (76%)                      |
| 2                                                                                                                                                       | 15 (19%)                      | 9 (18%)                       | 6 (21%)                       |
| ≥3                                                                                                                                                      | 2 (3%)                        | 3 (6%)                        | 1 (3%)                        |
| Alanine aminotransferase<br>concentration (IU/mL)                                                                                                       | 139 (74–315)                  | 144 (76–310)                  | 136 (70–427)                  |
| HCV RNA concentration (IU/mL)                                                                                                                           | 310 000<br>(34 000–1 400 000) | 330 000<br>(31 000–1 400 000) | 250 000<br>(49 000–1 500 000) |
| Time between estimated infection<br>date and HCV treatment (months)                                                                                     | 4.4 (1.2)                     | 4.3 (1.1)                     | 4.6 (1.3)                     |
| Time between first positive HCV RNA<br>test and HCV treatment (months)                                                                                  | 2.0 (1.0)                     | 2.0 (1.0)                     | 2.0 (1.1)                     |
| HBV co-infection                                                                                                                                        | 0                             | 0                             | 0                             |
| HIV co-infection                                                                                                                                        | 73 (91%)                      | 46 (90%)                      | 27 (93%)                      |
| CD4 cell count (per µL)                                                                                                                                 | 605 (490–765)                 | 601 (497–770)                 | 610 (396–767)                 |
| HIV viral load <50 copies per mL                                                                                                                        | 71 (97%)                      | 45 (98%)                      | 26 (96%)                      |
| Patient on combination ART                                                                                                                              | 73 (100%)                     | 46 (100%)                     | 27 (100%)                     |
| Data are mean (SD), n (%), or median (IQR). HCV=hepatitis C virus. MSM=men who have sex with men.<br>HBV=hepatitis B virus. ART=antiretroviral therapy. |                               |                               |                               |
| <b>Table 1: Baseline characteristics</b>                                                                                                                |                               |                               |                               |

|                                                   |                  |
|---------------------------------------------------|------------------|
| Baseline characteristics                          | DAHHS (n=57)     |
| Sex, male                                         | 57 (100%)        |
| Age, years, median (IQR)                          | 40 (34-47)       |
| CD4 count, E9/L, median (IQR)                     | 0·66 (0·45-0·79) |
| ALT, U/L, median (IQR)                            | 160 (67-416)     |
| Bilirubin, umol/L, median (IQR)                   | 10 (6·5-13)      |
| HCV genotype 1                                    |                  |
| subtype a                                         | 54 (95%)         |
| subtype b                                         | 3 (5%)           |
| unknown                                           | 0                |
|                                                   | 222.000          |
| HCV RNA IU/mL, median (IQR)                       | 1·235.000        |
| Treatment duration, weeks, median (IQR)           | 12 (12-12)       |
| Interval infection-treatment, weeks, median (IQR) | 22 (16·5-25)     |
| IL28B genotype                                    |                  |
| RS 1297, CC                                       | 25 (42·5%)       |
| RS 1297, non-CC                                   | 30 ( 57·5%)      |

**Table S2 – Phylogenetic comparison of whole genome sequences versus concatenated NS5A+NS5B sequences of**

## the DAHHS 1 samples

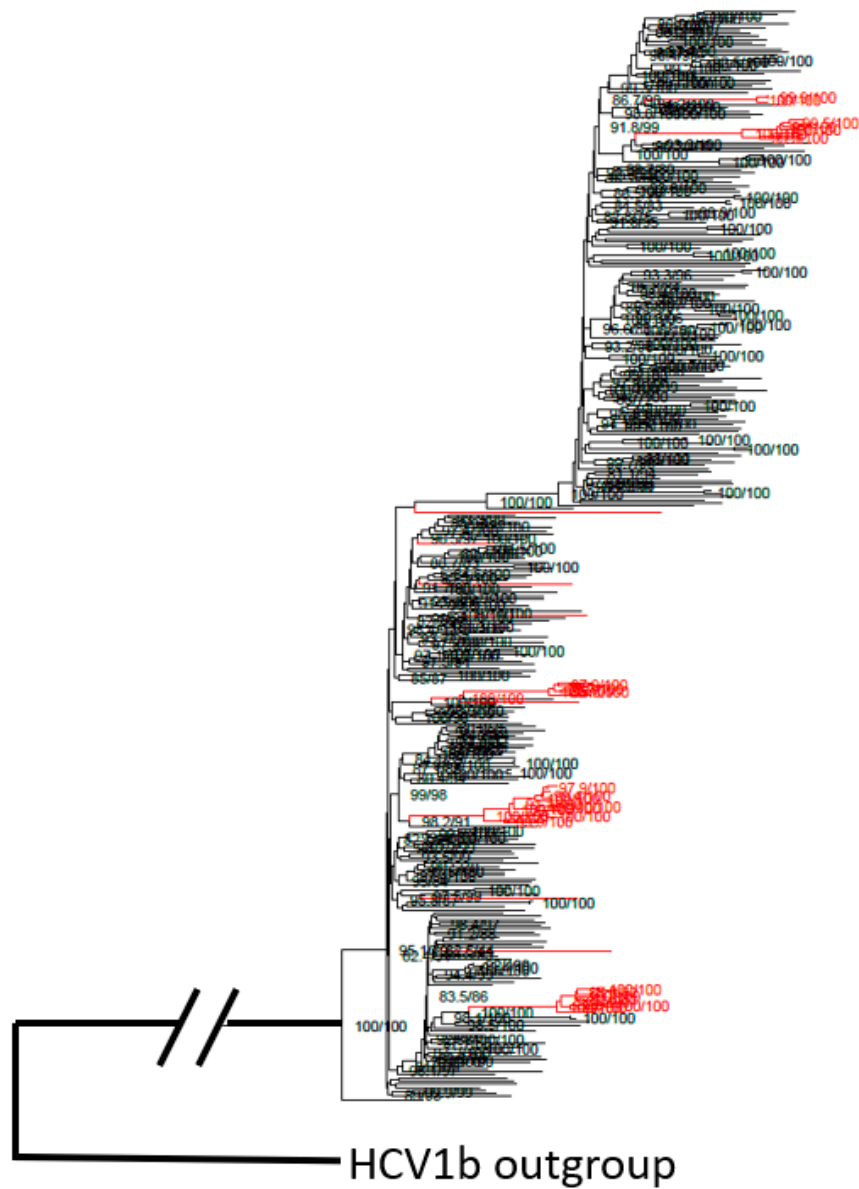

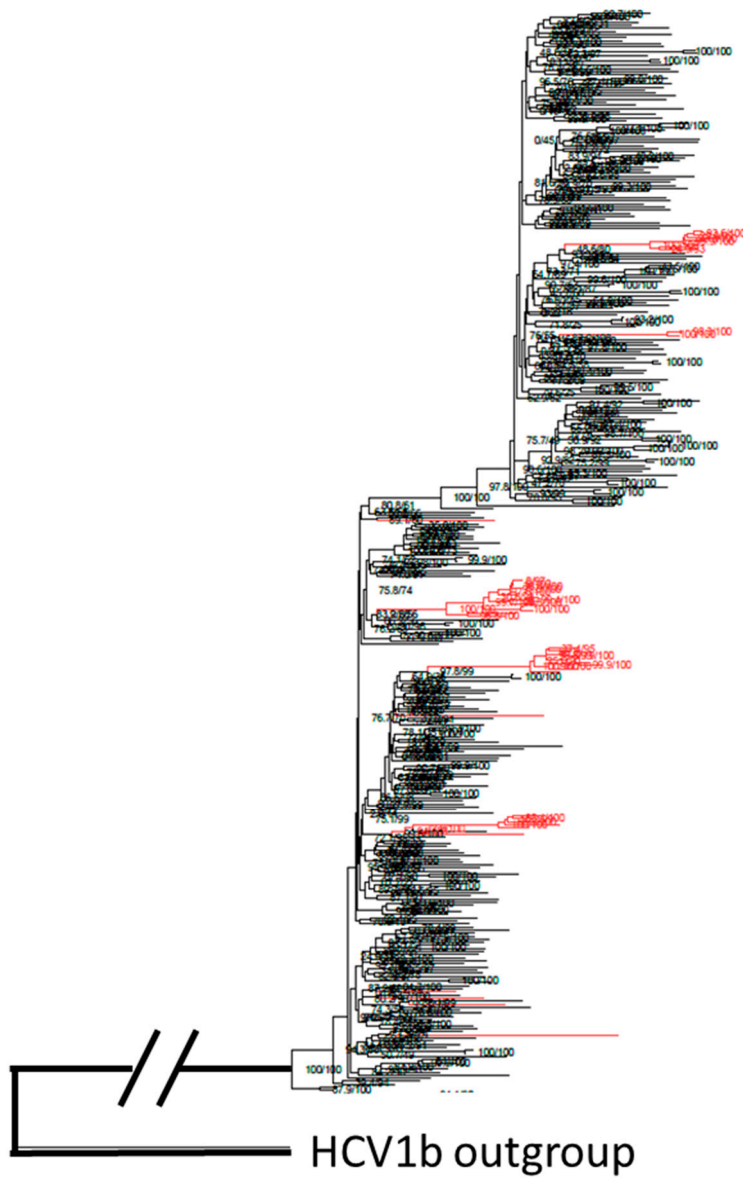

Figure S1: Upper phylogenetic tree consists of the whole genome sequences of the DAHHS 1 samples. The lower phylogenetic tree consists of the same DAHHS 1 samples only we used the concatenated NS5A+NS5B parts. Maximum likelihood analysis was performed with a GTR+G4+I model. We did not find any differences in the cluster structure and number of clusters in the tree.
